# Supplementary material for: Sea ice-related halogen enrichment at Law Dome, coastal EastAntarctica
Source: Copernicus journal article supplement (doi:10.5194/cp-2016-74), 2016-07-13
Supplement: Supplementary file 1 [file cp-2016-74-supplement.pdf]

Table S1: Information regarding surface snow samples collected during the Casey-Law Dome traverse on 10th February 2016.

| Sample designation | Sampling time | Latitude    | Longitude   | Distance from Casey<br>(km) | Altitude<br>(m) | Accumulation<br>(m yr <sup>-1</sup> we) | Na concentration   |           | Br concentration   |           | Br Flux<br>(mg m <sup>-2</sup> yr <sup>-1</sup> ) | Na flux<br>(mg m <sup>-2</sup> yr <sup>-1</sup> ) |
|--------------------|---------------|-------------|-------------|-----------------------------|-----------------|-----------------------------------------|--------------------|-----------|--------------------|-----------|---------------------------------------------------|---------------------------------------------------|
|                    |               | (degrees S) | (degrees E) |                             |                 |                                         | ng g <sup>-1</sup> | std error | ng g <sup>-1</sup> | std error |                                                   |                                                   |
| LD1                | 08:19         | -66.3       | 111.0       | 20                          | 500             | 0.15                                    | 97.3               | 4.0       | 1.32               | 0.04      | 0.20                                              | 14.6                                              |
| LD2                | 08:32         | -66.3       | 111.1       | 25                          | 600             | 0.15                                    | 332.1              | 10.6      | 0.76               | 0.02      | 0.11                                              | 49.8                                              |
| LD3                | 09:03         | -66.4       | 111.3       | 35                          | 700             | 0.15                                    | 285.7              | 10.4      | 2.45               | 0.10      | 0.37                                              | 42.9                                              |
| LD4                | 09:20         | -66.4       | 111.4       | 41.2                        | 750             | 0.15                                    | 231.2              | 7.1       | 0.99               | 0.05      | 0.15                                              | 34.7                                              |
| LD5                | 09:57         | -66.4       | 111.7       | 57.1                        | 959             | 0.15                                    | 155.1              | 3.2       | 0.32               | 0.02      | 0.05                                              | 23.3                                              |
| LD6                | 10:40         | -66.5       | 112.0       | 69.7                        | 1071            | 0.15                                    | 16.8               | 1.1       | 1.12               | 0.06      | 0.17                                              | 2.5                                               |
| LD7                | 11:08         | -66.5       | 112.2       | 80.1                        | 1155            | 0.2                                     | 199.0              | 9.0       | 2.06               | 0.07      | 0.41                                              | 39.8                                              |
| LD8                | 11:39         | -66.6       | 112.4       | 90.7                        | 1235            | 0.3                                     | 194.7              | 3.6       | 0.46               | 0.03      | 0.14                                              | 58.4                                              |
| LD9                | 12:05         | -66.7       | 112.6       | 101                         | 1320            | 0.45                                    | 204.9              | 9.3       | 1.72               | 0.11      | 0.77                                              | 92.2                                              |
| LD10               | 12:33         | -66.7       | 112.8       | 111                         | 1372            | 0.6                                     | 235.2              | 11.8      | 2.22               | 0.06      | 1.33                                              | 141.1                                             |
| LD11               | 12:53         | -66.8       | 112.8       | 114                         | 1350            | 0.8                                     | 7.0                | 1.7       | 1.23               | 0.04      | 0.98                                              | 5.6                                               |
